# Supplementary material
Source: MDPI journal article supplement (https://www.mdpi.com/2304-6767/12/2/23)
Supplement: s1 [file s1]

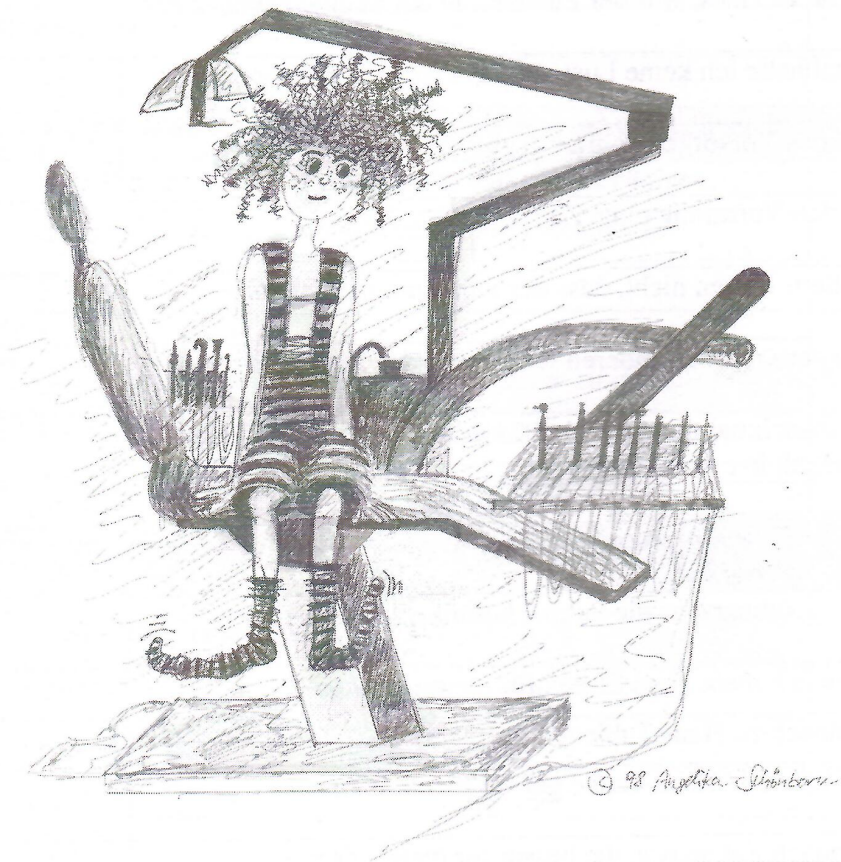

# Ein Besuch beim Zahnarzt

Auf den nächsten Seiten findest Du einige Sätze. Es sind Aussagen darüber, wie Du Dich vielleicht fühlst, wenn Du zum Zahnarzt gehst. Versuche bitte, diese Sätze der Reihe nach zu beantworten, ob sie für Dich zutreffen oder nicht.

Bitte beantworte **alle** Sätze und ohne lange darüber nachzudenken. Es gibt keine richtigen oder falschen Antworten. Wenn eine Aussage für Dich zutrifft, machst Du ein Kreuz in das Kästchen unter dem Wort „Stimmt“.

Wenn sie nicht zutrifft, machst Du ein Kreuz unter den Wörtern „Stimmt nicht“.

## Beispiel:

|                                                                                 | stimmt                              | stimmt<br>nicht                     |
|---------------------------------------------------------------------------------|-------------------------------------|-------------------------------------|
| Ich gehe gerne zum Zahnarzt.                                                    | <input type="checkbox"/>            | <input type="checkbox"/>            |
| Wenn Du also gern zum Zahnarzt gehst, kreuzt Du das Kästchen unter „stimmt“ an. | <input checked="" type="checkbox"/> | <input type="checkbox"/>            |
| Wenn Du nicht gern zum Zahnarzt gehst, kreuzt Du das Kästchen „Stimmt nicht“ an | <input type="checkbox"/>            | <input checked="" type="checkbox"/> |



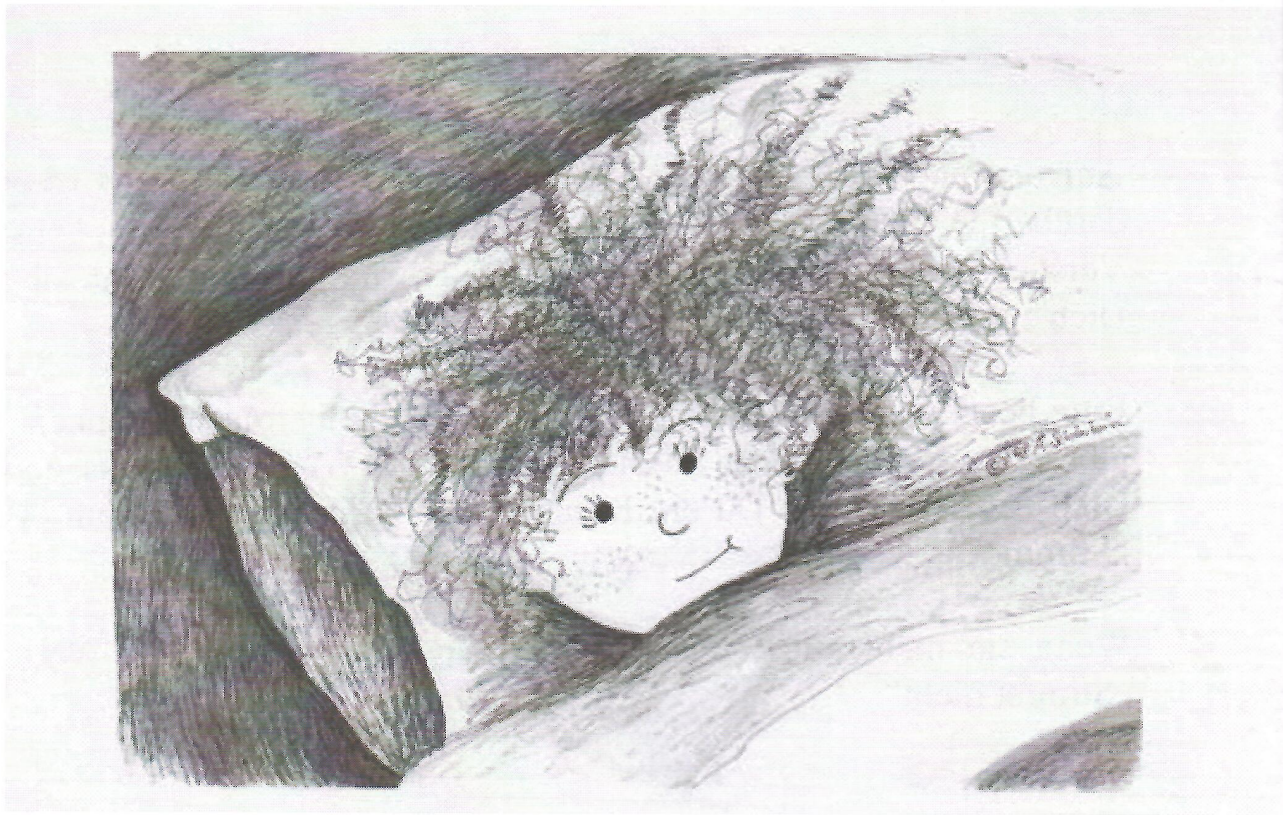

*Stelle Dir vor, Du bist zu Hause und liegst im Bett. Im Zimmer ist es schon dunkel. Da fällt Dir ein, dass Du morgen zum Zahnarzt gehst. Kreuze an, was Du jetzt denkst und fühlst.*

- |                                                                                  | stimmt                   | stimmt<br>nicht          |
|----------------------------------------------------------------------------------|--------------------------|--------------------------|
| 1. Ich kann lange nicht einschlafen, weil ich mir so viele Gedanken machen muss. | <input type="checkbox"/> | <input type="checkbox"/> |
| 2. Ich habe Bauchschmerzen.                                                      | <input type="checkbox"/> | <input type="checkbox"/> |
| 3. Ich wünschte, dass ich nie mehr zum Zahnarzt gehen muss.                      | <input type="checkbox"/> | <input type="checkbox"/> |
| 4. Ich schlafe vor Aufregung schlecht ein.                                       | <input type="checkbox"/> | <input type="checkbox"/> |
| 5. Ich weine, weil ich zum Zahnarzt muss.                                        | <input type="checkbox"/> | <input type="checkbox"/> |

Bitte kreuze den Strich auf der Linie an, der zeigt, wie viel Angst Du in dieser Situation hast:

keine Angst    + + + + + + + + +    sehr viel Angst



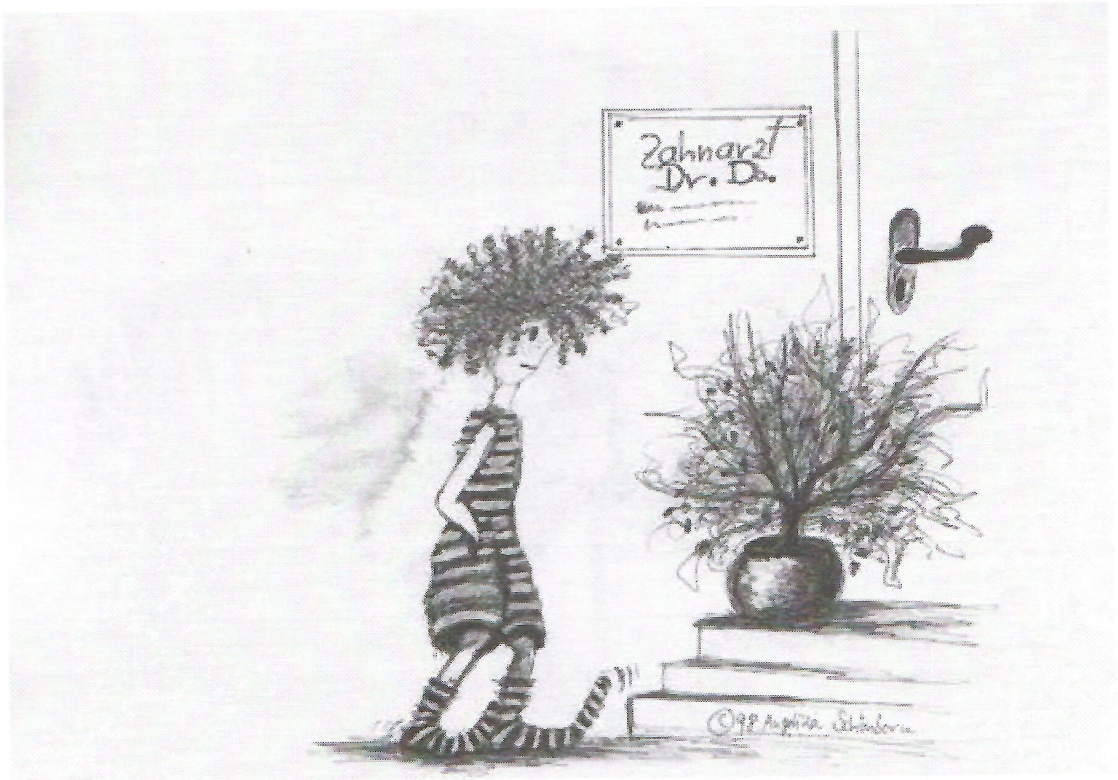

*Stelle Dir vor, Du bist auf dem Weg zum Zahnarzt. Du kannst das Haus, in dem der Zahnarzt seine Praxis hat, schon sehen. Gleich wirst Du durch die Eingangstür gehen.  
Kreuze an, was Du **jetzt** denkst und fühlst.*

- |                                                                        | stimmt                   | stimmt<br>nicht          |
|------------------------------------------------------------------------|--------------------------|--------------------------|
| 6. Ich werde immer aufgeregter, je näher ich der Zahnarztpraxis komme. | <input type="checkbox"/> | <input type="checkbox"/> |
| 7. Ich hätte Lust wegzulaufen.                                         | <input type="checkbox"/> | <input type="checkbox"/> |
| 8. Ich glaube, dass etwas ganz Schlimmes passieren wird.               | <input type="checkbox"/> | <input type="checkbox"/> |
| 9. Meine Knie zittern.                                                 | <input type="checkbox"/> | <input type="checkbox"/> |
| 10. Ich habe einen ganz trockenen Mund.                                | <input type="checkbox"/> | <input type="checkbox"/> |

Bitte kreuze den Strich auf der Linie an, der zeigt, wie viel Angst Du in dieser Situation hast:

keine Angst    + + + + + + + + + +    sehr viel Angst



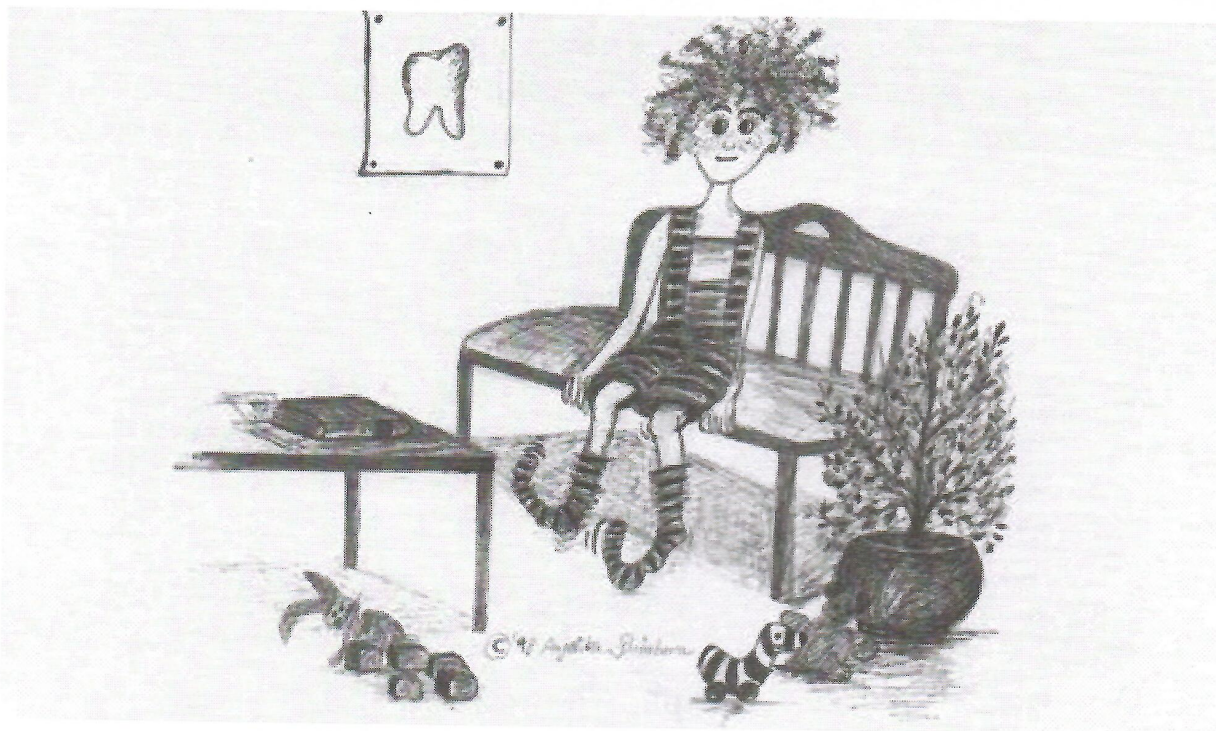

*Stelle Dir vor, Du sitzt jetzt im Wartezimmer. Du bist noch nicht an der Reihe. In Deiner Nähe liegen Bücher, Zeitschriften und Spielzeug. Jeden Moment wird Dich die Zahnarthelferin hereinrufen. Kreuze an, was Du jetzt denkst und fühlst.*

- |                                                              | stimmt                   | stimmt<br>nicht          |
|--------------------------------------------------------------|--------------------------|--------------------------|
| 11. Ich möchte wieder nach Hause gehen.                      | <input type="checkbox"/> | <input type="checkbox"/> |
| 12. Ich muss immer wieder zur Toilette.                      | <input type="checkbox"/> | <input type="checkbox"/> |
| 13. Mir wird übel.                                           | <input type="checkbox"/> | <input type="checkbox"/> |
| 14. Ich werde nervös, wenn die Zahnarthelferin mich aufruft. | <input type="checkbox"/> | <input type="checkbox"/> |
| 15. Ich denke, dass es ganz furchtbar wird.                  | <input type="checkbox"/> | <input type="checkbox"/> |

Bitte kreuze den Strich auf der Linie an, der zeigt, wie viel Angst Du in dieser Situation hast:

keine Angst    + + + + + + + +    sehr viel Angst

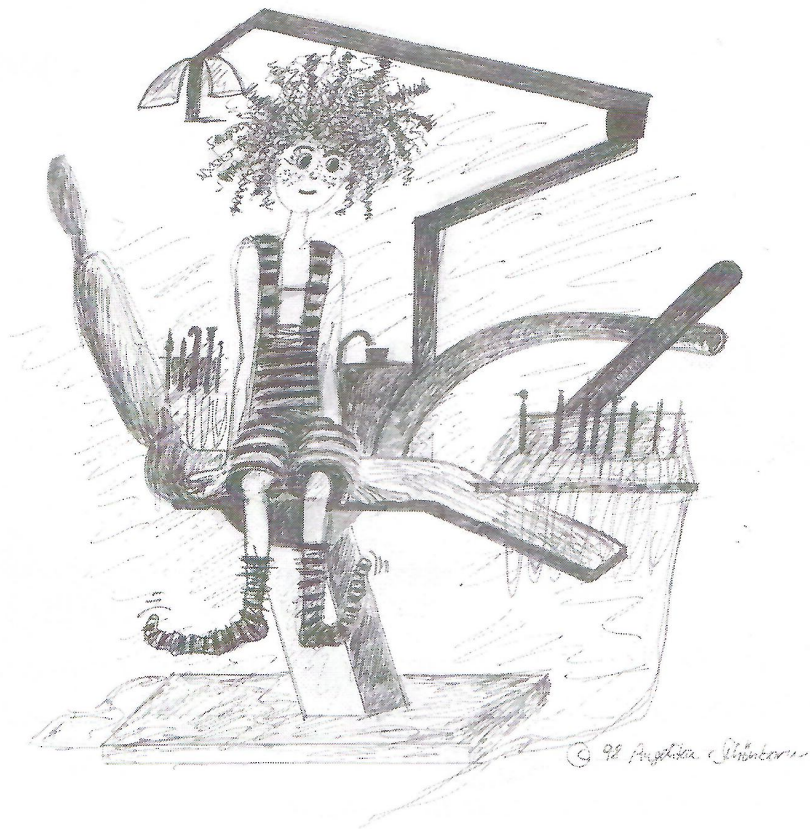

*Stelle Dir vor, dass Du im Behandlungsstuhl sitzt. Es riecht nach Zahnarzt. Der Zahnarzt grüsst Dich. Du siehst die verschiedenen Instrumente. Gleich wird eins davon benutzt.*

*Kreuze an, was Du **jetzt** denkst und fühlst.*

- |                                                                    | stimmt                   | stimmt<br>nicht          |
|--------------------------------------------------------------------|--------------------------|--------------------------|
| 16. Wenn ich den Zahnarzt sehe, muss ich weinen.                   | <input type="checkbox"/> | <input type="checkbox"/> |
| 17. Ich will, dass jemand von meiner Familie bei mir bleiben darf. | <input type="checkbox"/> | <input type="checkbox"/> |
| 18. Ich wünschte, ich wäre weit weg.                               | <input type="checkbox"/> | <input type="checkbox"/> |
| 19. Mir bricht der Schweiß aus.                                    | <input type="checkbox"/> | <input type="checkbox"/> |
| 20. Ich fange an zu stottern, wenn der Zahnarzt mit mir spricht.   | <input type="checkbox"/> | <input type="checkbox"/> |

Bitte kreuze den Strich auf der Linie an, der zeigt, wie viel Angst Du in dieser Situation hast:

keine Angst    + + + + + + + + + +    sehr viel Angst



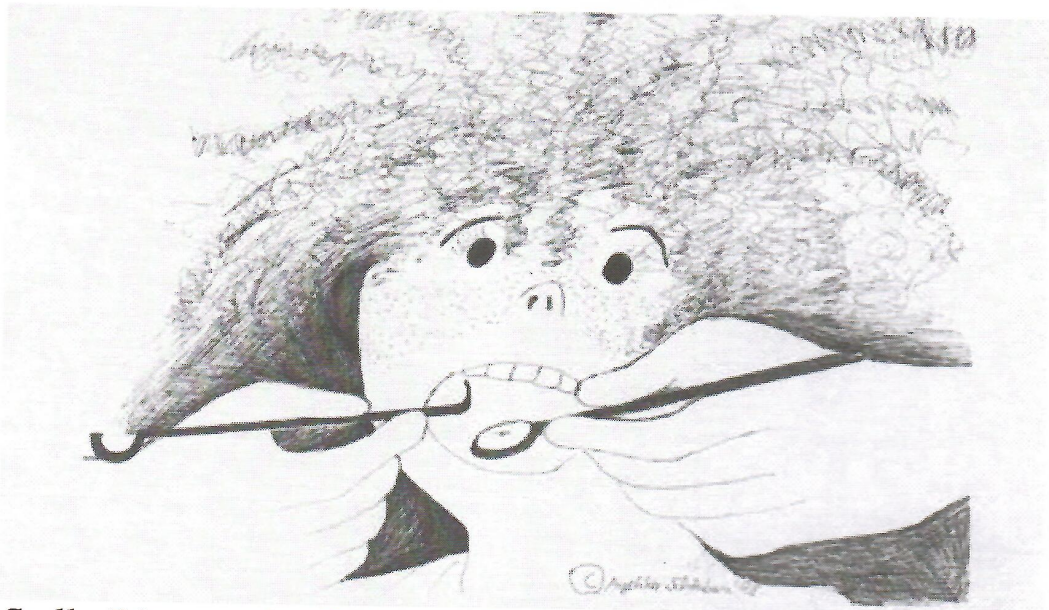

*Stelle Dir vor, der Zahnarzt fängt mit der Untersuchung an. Du liegst im Behandlungsstuhl, Dein Mund ist weit offen. Der Zahnarzt beugt sich über Dich und steckt Instrumente in Deinen Mund. Kreuze an, was Du **jetzt** denkst und fühlst.*

- |                                                             | stimmt                   | stimmt<br>nicht          |
|-------------------------------------------------------------|--------------------------|--------------------------|
| 21. Ich kann das Geräusch des Zahnbohrers nicht ertragen.   | <input type="checkbox"/> | <input type="checkbox"/> |
| 22. Ich muss daran denken, was alles noch geschehen könnte. | <input type="checkbox"/> | <input type="checkbox"/> |
| 23. Ich mache die Augen ganz fest zu.                       | <input type="checkbox"/> | <input type="checkbox"/> |
| 24. Ich habe ganz starkes Herzklopfen.                      | <input type="checkbox"/> | <input type="checkbox"/> |
| 25. Ich halte mich am Behandlungsstuhl ganz fest.           | <input type="checkbox"/> | <input type="checkbox"/> |

Bitte kreuze den Strich auf der Linie an, der zeigt, wie viel Angst Du in dieser Situation hast:

keine Angst    + — + — + — + — + — + — + —    sehr viel Angst

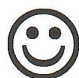

**Vielen Dank für Deine Mitarbeit!**
